# Supplementary material for: Novel Chitosan-Silica Hybrid Hydrogels for Cell Encapsulation and Drug Delivery
Source: MDPI journal article supplement (doi:10.3390/ijms222212267), 2021-11-12
Supplement: s1 [file s1]

**Supplementary Materials:** The following are available online at [www.mdpi.com/1422-0067/222/21/2267/s1](http://www.mdpi.com/1422-0067/222/21/2267/s1).

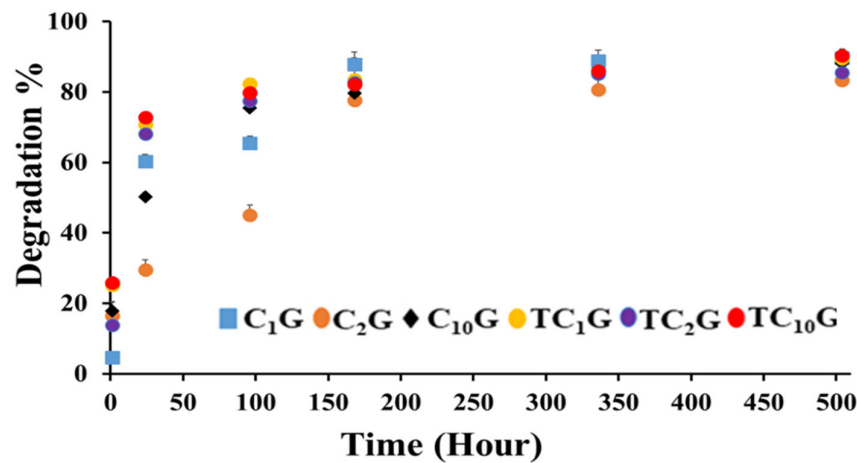

Figure S1: Degradation percentages for the different types of hydrogels after 504 hours showing the slowest degradation rate in C<sub>2</sub>G and TC<sub>2</sub>G.

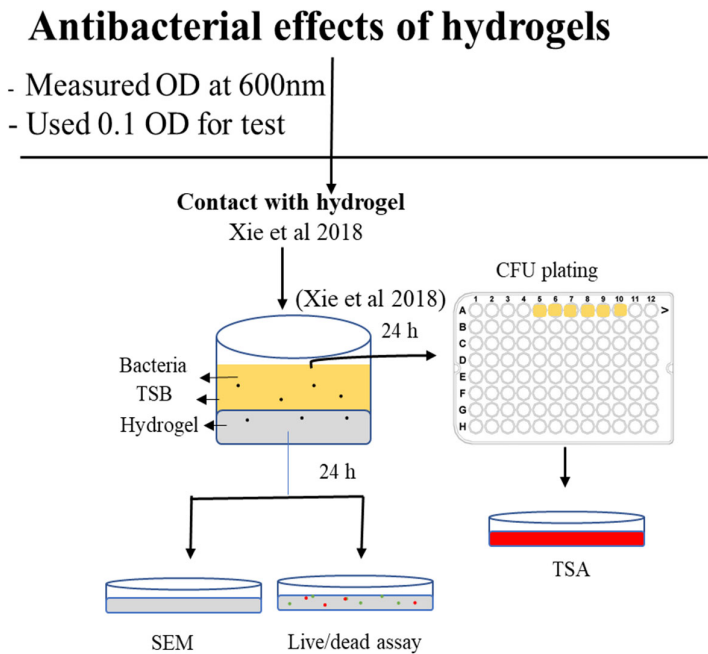

Figure S2: Schematic showing the assays used to evaluate the antibacterial activity of hydrogels. CFU: colony-forming unite, TSB: Tryptic soy broth, TSA: tryptone soya agar, SEM: scanning electron microscope.

**Table S1.** Silica release from the different types of hydrogels at 0.5, 1, 7, 24, 96, 168, 336, 504 hours. Significant differences were identified through one-way ANOVAs and post-hoc Tukey comparisons ( $p < 0.05$ ). Lower case letters represent the post-hoc Tukey comparisons at each time (across the rows) where the significantly highest to lowest release is represented in ascending alphabetical order.

| Hydrogels<br>Time (hour) | C2G BPS                 | C <sub>2</sub> G E     | TC <sub>2</sub> G PBS   | TC <sub>2</sub> G E    |
|--------------------------|-------------------------|------------------------|-------------------------|------------------------|
| 0.5                      | 0.88±0.1 <sup>bc</sup>  | 3.04±0.39 <sup>a</sup> | 0.77±0.17 <sup>c</sup>  | 0.97±0.18 <sup>b</sup> |
| 1                        | 0.869±0.09 <sup>b</sup> | 1.29±0.54 <sup>a</sup> | 0.55±0.13 <sup>c</sup>  | 0.76±0.08 <sup>b</sup> |
| 7                        | 5.0±0.26 <sup>b</sup>   | 7.84±0.2 <sup>a</sup>  | 2.83±0.35 <sup>d</sup>  | 1.94±0.24 <sup>c</sup> |
| 24                       | 3.05±0.37 <sup>a</sup>  | 1.11±0.17 <sup>c</sup> | 2.46±0.62 <sup>b</sup>  | 2.69±0.26 <sup>b</sup> |
| 96                       | 0.79±0.05 <sup>d</sup>  | 1.55±0.08 <sup>c</sup> | 2.04±0.08 <sup>a</sup>  | 1.87±0.06 <sup>b</sup> |
| 168                      | 1.11±0.9 <sup>d</sup>   | 1.31±0.21 <sup>b</sup> | 1.28±0.013 <sup>c</sup> | 1.41±0.1 <sup>a</sup>  |
| 336                      | 1.42±0.1 <sup>d</sup>   | 1.96±0.1 <sup>b</sup>  | 1.67±0.01 <sup>c</sup>  | 2.08±0.12 <sup>a</sup> |
| 504                      | 0.95±0.10 <sup>d</sup>  | 1.58±0.25 <sup>b</sup> | 1.18±0.06 <sup>c</sup>  | 1.70±0.14 <sup>a</sup> |

**Table S2:** Glycerol release from the different types of hydrogels at 0.5, 1, 7, 24, 96, 168, 336, 360, 504 hours. Significant differences were identified through one-way ANOVAs and post-hoc Tukey comparisons ( $p < 0.05$ ). Lower case letters represent the post-hoc Tukey comparisons at each time (across the rows) where the significantly highest to lowest release is represented in ascending alphabetical order.

| Hydrogels<br>Time (hour) | C2G BPS                      | C2G E                        | TC2G PBS                     | TC2G E                       |
|--------------------------|------------------------------|------------------------------|------------------------------|------------------------------|
| 0.5                      | 217.45 $\pm$ 37 <sup>b</sup> | 248.53 $\pm$ 30 <sup>a</sup> | 169.78 $\pm$ 31 <sup>c</sup> | 172.53 $\pm$ 32 <sup>c</sup> |
| 1                        | 166.4 $\pm$ 28 <sup>b</sup>  | 169.35 $\pm$ 39 <sup>a</sup> | 162.15 $\pm$ 29 <sup>c</sup> | 162.65 $\pm$ 25 <sup>c</sup> |
| 7                        | 136.25 $\pm$ 31 <sup>a</sup> | 136.83 $\pm$ 10 <sup>a</sup> | 100.15 $\pm$ 16 <sup>c</sup> | 121.5 $\pm$ 21 <sup>b</sup>  |
| 24                       | 80.33 $\pm$ 19 <sup>a</sup>  | 80.7 $\pm$ 17 <sup>a</sup>   | 79.33 $\pm$ 9 <sup>a</sup>   | 79.55 $\pm$ 11 <sup>a</sup>  |
| 96                       | 227.03 $\pm$ 40 <sup>a</sup> | 228.68 $\pm$ 44 <sup>a</sup> | 221.4 $\pm$ 45 <sup>d</sup>  | 225.05 $\pm$ 45 <sup>b</sup> |
| 168                      | 197.48 $\pm$ 20 <sup>b</sup> | 198.53 $\pm$ 31 <sup>a</sup> | 193.08 $\pm$ 23 <sup>d</sup> | 195.75 $\pm$ 41              |
| 336                      | 140.4 $\pm$ 35 <sup>b</sup>  | 146.9 $\pm$ 29 <sup>a</sup>  | 124.95 $\pm$ 36 <sup>d</sup> | 134.73 $\pm$ 23 <sup>c</sup> |
| 360                      | 4.38 $\pm$ 1 <sup>b</sup>    | 4.975 $\pm$ 0.5 <sup>a</sup> | 2.875 $\pm$ 0.4 <sup>d</sup> | 3.975 $\pm$ 0.8 <sup>c</sup> |
| 504                      | 0                            | 0                            | 0                            | 0                            |

**Table S3:** Chitosan monomers release from the different types of hydrogels at 0.5, 1, 7, 24, 96, 168, 504 hours. Significant differences were identified through one-way ANOVAs and post-hoc Tukey comparisons ( $p < 0.05$ ). Lower case letters represent the post-hoc Tukey comparisons at each time (across the rows) where the significantly highest to lowest release is represented in ascending alphabetical order.

| Hydrogels<br>Time (HOUR) | C2G BPS                 | C2G E                  | TC2G PBS               | TC2G E                  |
|--------------------------|-------------------------|------------------------|------------------------|-------------------------|
| 0.5                      | 2.62±0.43 <sup>b</sup>  | 3±0.2 <sup>a</sup>     | 1.83±0.1 <sup>d</sup>  | 1.97±0.37 <sup>c</sup>  |
| 1                        | 1.20±0.1 <sup>b</sup>   | 1.31±0.13 <sup>a</sup> | 0.78±0.14 <sup>d</sup> | 1.04±0.12 <sup>c</sup>  |
| 7                        | 0.66±0.13 <sup>ab</sup> | 0.69±0.13 <sup>a</sup> | 0.62±0.06 <sup>c</sup> | 0.63±0.03 <sup>bc</sup> |
| 24                       | 0.57±0.14 <sup>a</sup>  | 0.58±0.13 <sup>a</sup> | 0.46±0.41 <sup>b</sup> | 0.49±0.01 <sup>b</sup>  |
| 96                       | 1.14±0.12 <sup>ab</sup> | 1.17±0.24 <sup>a</sup> | 1.03±0.7 <sup>b</sup>  | 1.12±0.17 <sup>ab</sup> |
| 168                      | 0.64±0.13 <sup>ab</sup> | 0.65±0.13 <sup>a</sup> | 0.6±0.09 <sup>b</sup>  | 0.61±0.01 <sup>bc</sup> |
| 336                      | 1.09±0.13 <sup>a</sup>  | 1.19±0.12 <sup>a</sup> | 1.06±0.11 <sup>a</sup> | 1.12±0.15 <sup>a</sup>  |
| 504                      | 0.81±0.1 <sup>ab</sup>  | 0.86±0.11 <sup>a</sup> | 0.77±0.07 <sup>b</sup> | 0.79±0.03 <sup>b</sup>  |

**Table S4:** Effect of the different hydrogels on metabolic activity of osteoblasts at 24, 48, 72 and 168 hours. Significant differences were identified through one-way ANOVAs and post-hoc Tukey comparisons ( $p < 0.05$ ). Lower case letters represent the post-hoc Tukey comparisons at each time (across the rows) where the significantly highest to lowest release is represented in ascending alphabetical order.

| Hydrogels<br>Time (HOUR) | C <sub>1</sub> G        | C <sub>2</sub> G        | C <sub>10</sub> G        | TC <sub>1</sub> G        | TC <sub>2</sub> G        | TC <sub>10</sub> G     |
|--------------------------|-------------------------|-------------------------|--------------------------|--------------------------|--------------------------|------------------------|
| 24                       | 49.01±2.9 <sup>a</sup>  | 48.09±1.8 <sup>a</sup>  | 49.15±9.5 <sup>a</sup>   | 51.33±5.9 <sup>a</sup>   | 51.89±4.06 <sup>a</sup>  | 51.58±3.5 <sup>a</sup> |
| 48                       | 42.10±7.0 <sup>b</sup>  | 59.58±6.1 <sup>ab</sup> | 59.68±10.4 <sup>ab</sup> | 66.41±12.3 <sup>ab</sup> | 63.48±10.3 <sup>ab</sup> | 68.88±5.6 <sup>a</sup> |
| 72                       | 57.35±3.1 <sup>ab</sup> | 68.01±1.8 <sup>a</sup>  | 52.41±11.4 <sup>b</sup>  | 69.54±7.5 <sup>a</sup>   | 64.09±6.4 <sup>ab</sup>  | 71.49±3.7 <sup>a</sup> |
| 168                      | 61.69±3.3 <sup>b</sup>  | 71.93±8.3 <sup>ab</sup> | 65.37±10.8 <sup>ab</sup> | 79.43±8.9 <sup>a</sup>   | 79.59±2.8 <sup>ab</sup>  | 77.18±8 <sup>ab</sup>  |
